# Supplementary material
Source: PubMed Central journal article supplement (PMC10114902)
Supplement: bg1c00050_si_001.pdf [file bg1c00050_si_001.pdf]

## Supporting Information

### Discovery of JND003 as a New Selective Estrogen-Related Receptor $\alpha$ (ERR $\alpha$ ) Agonist Alleviating Nonalcoholic Fatty Liver Disease and Insulin Resistance

Liufeng Mao <sup>1#</sup>, Lijie Peng <sup>2#</sup>, Xiaomei Ren <sup>2#</sup>, Yi Chu <sup>3,4</sup>, Tao Nie <sup>3,4</sup>, Wanhua Lin <sup>5</sup>, Andrew Libby <sup>7</sup>, Yong Xu <sup>3,4</sup>, Yu Chang <sup>2</sup>, Chong Lei <sup>2</sup>, Kerry Loomes <sup>8</sup>, Na Wang <sup>3,9</sup>, Jinsong Liu <sup>3,9</sup>, Moshe Levi <sup>7</sup>, Donghai Wu <sup>3,4</sup>, Xiaoyan Hui <sup>6\*</sup>, Ke Ding <sup>2,10,11\*</sup>

<sup>1</sup>Scientific Research Center, the First Affiliated Hospital of Guangdong Pharmaceutical University, Nonglinxi Road 19, Guangzhou, Guangdong, 510080, PR China

<sup>2</sup>International Cooperative Laboratory of Traditional Chinese Medicine Modernization and Innovative Drug Development of Chinese Ministry of Education (MOE), School of Pharmacy, Jinan University, 601 Huangpu Avenue West, Guangzhou 510632, China

<sup>3</sup> Guangzhou Institutes of Biomedicine and Health, Guangzhou 510530, China

<sup>4</sup> China-New Zealand Joint Laboratory on Biomedicine and Health, Guangzhou 510530, China

<sup>5</sup> School of Life Sciences, Guangxi Normal University, Guilin, 541004, China

<sup>6</sup> School of Biomedical Sciences, the Chinese University of Hong Kong, Hong Kong SAR

<sup>7</sup> Department of Biochemistry and Molecular & Cellular Biology, Basic Science 353, Georgetown University, 3900 Reservoir Road, Washington, DC 20057, USA

<sup>8</sup> School of Biological Sciences and Maurice Wilkins Centre, University of Auckland, Auckland, New Zealand

<sup>9</sup> School of Life Sciences, University of Science and Technology of China, Hefei, 230026, China

<sup>10</sup> The First Affiliated Hospital of Jinan University, Guangzhou, 510630, China

<sup>11</sup> State Key Laboratory of Bioorganic Chemistry and Natural Products, Shanghai Institute of Organic Chemistry, Chinese Academy of Sciences, Shanghai, 210530, China

# These authors contributed equally to this work.

\* To whom correspondence should be addressed (email: [dingke@jnu.edu.cn](mailto:dingke@jnu.edu.cn), [hannahhui@cuhk.edu.hk](mailto:hannahhui@cuhk.edu.hk))

## Content

|                                                                               |            |
|-------------------------------------------------------------------------------|------------|
| <b>FIG. S1.</b> Food intake of mice.....                                      | <b>S3</b>  |
| <b>FIG. S2.</b> JND003 up-regulates $ERR\alpha$ and related genes.....        | <b>S4</b>  |
| <b>FIG. S3.</b> Selectivity of JND003.....                                    | <b>S5</b>  |
| <b>FIG. S4.</b> IGTT and ITT in $ERR\alpha$ -LKO mice.....                    | <b>S5</b>  |
| <b>FIG. S5.</b> JND003 does not induce the differentiation of adipocytes..... | <b>S6</b>  |
| <b>NMR spectra</b> .....                                                      | <b>S6</b>  |
| <b>HPLC trace of JND003</b> .....                                             | <b>S8</b>  |
| <b>Table S1.</b> Pharmacokinetic parameters of JND003 in SD Rat.....          | <b>S9</b>  |
| <b>Table S2.</b> Tissue distribution of JND003 in SD Rat.....                 | <b>S9</b>  |
| <b>Table S2.</b> Primers used for quantitative PCR.....                       | <b>S21</b> |

## Supplementary Figures

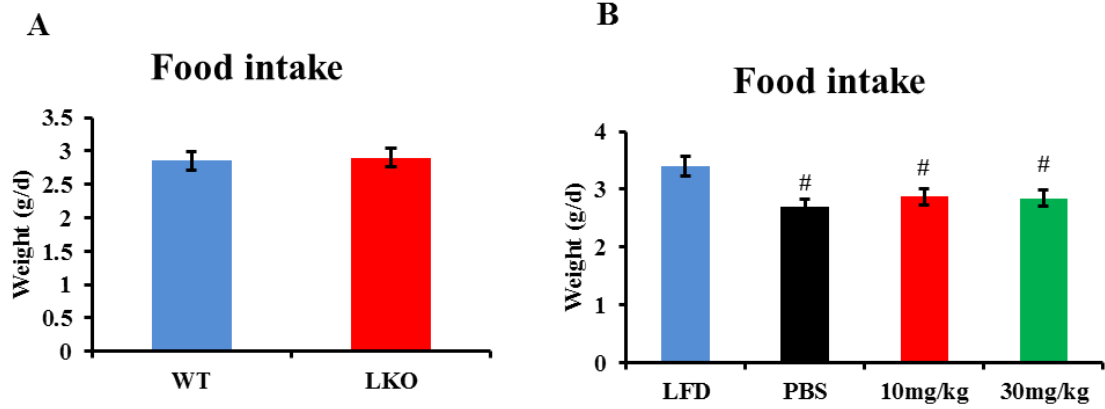

**FIG. S1. Food intake of mice.** (A) Food intake of wild-type and LKO mice; (B) Food intake between PBS and JND003 treated mice. <sup>#</sup> $p < 0.05$ , compared with control mice,  $n=5$ .

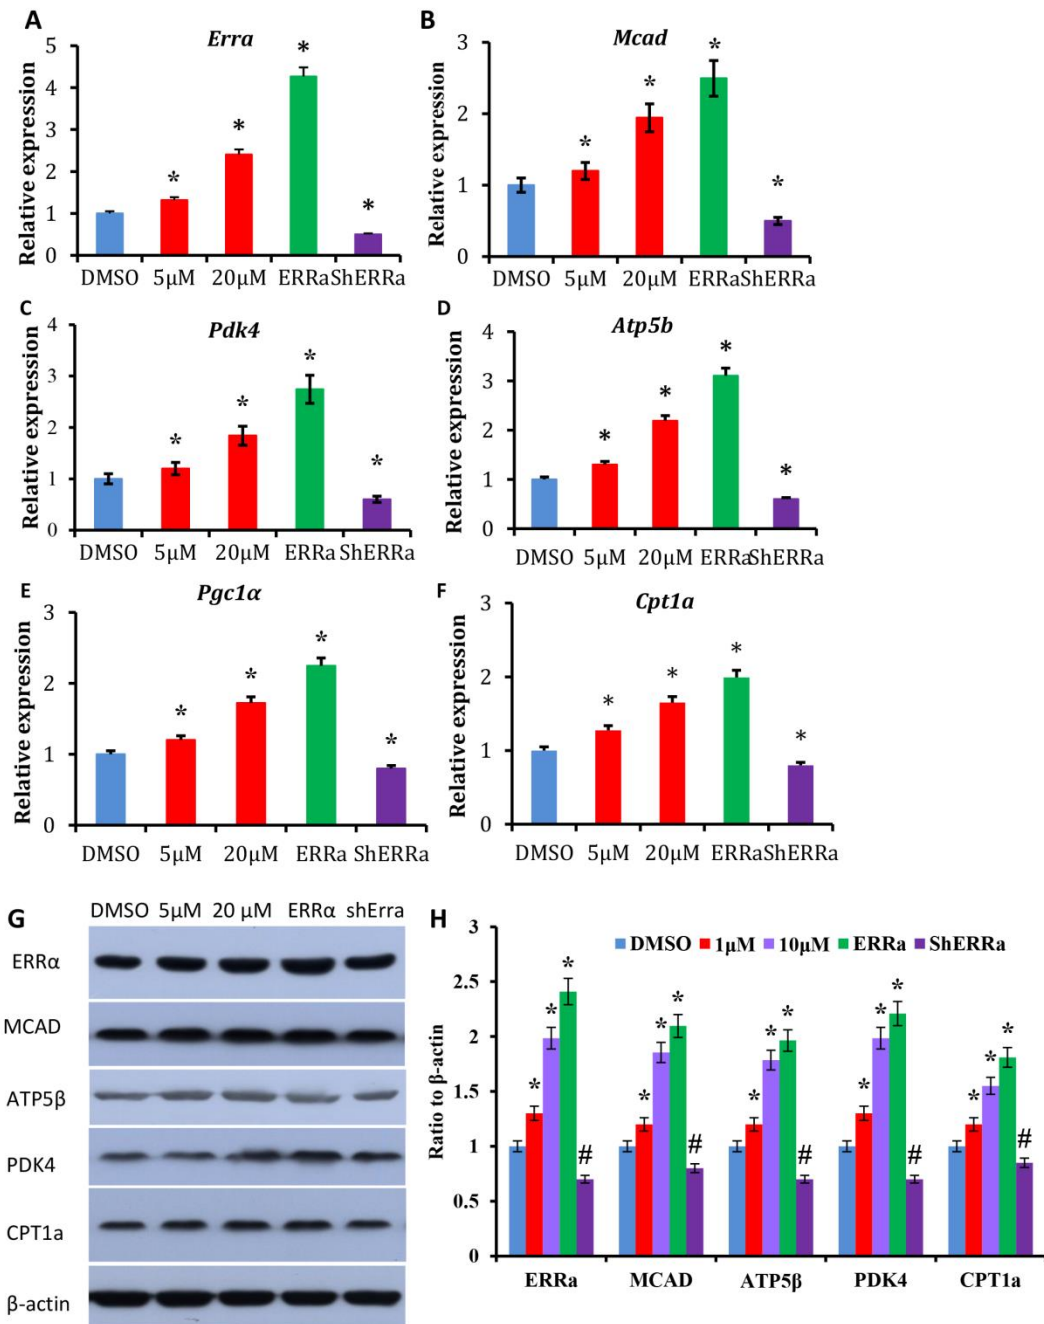

**FIG. S2. JND003 (Compound 7) enhances the expression of ERRα and related genes in HepG2-IR cells.** Relative RNA expression of (A) *Erra*, (B) *Mcad*, (C) *Pdk4*, (D) *Atp5β*, (E) *Pgc1α* and (F) *Cpt1a* with HepG2-IR cells treated by JND003 or DMSO; (G-H) western blot results with HepG2-IR cells treated by JND003 or DMSO. \* $p < 0.05$  vs. DMSO.

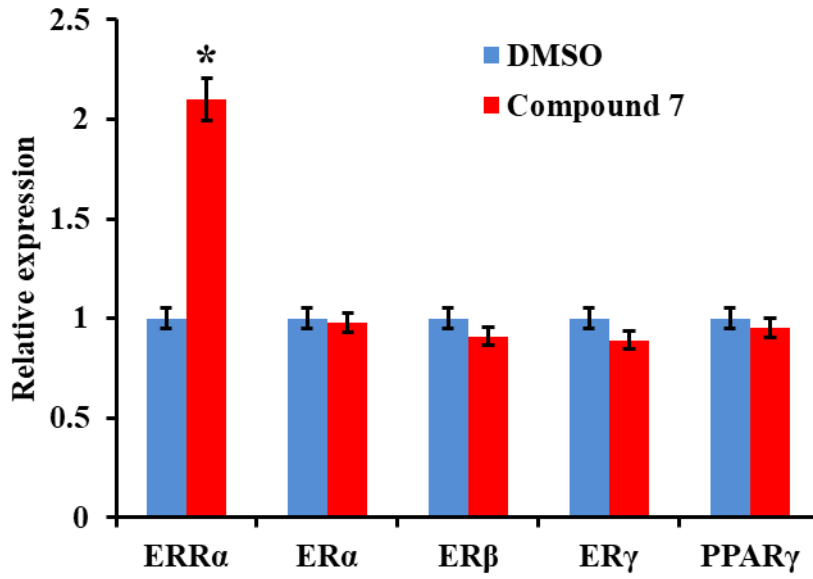

FIG. S3. Compound 7 (JND003) selectively elevates the activity of ERRα. \* $p < 0.05$  vs. DMSO.

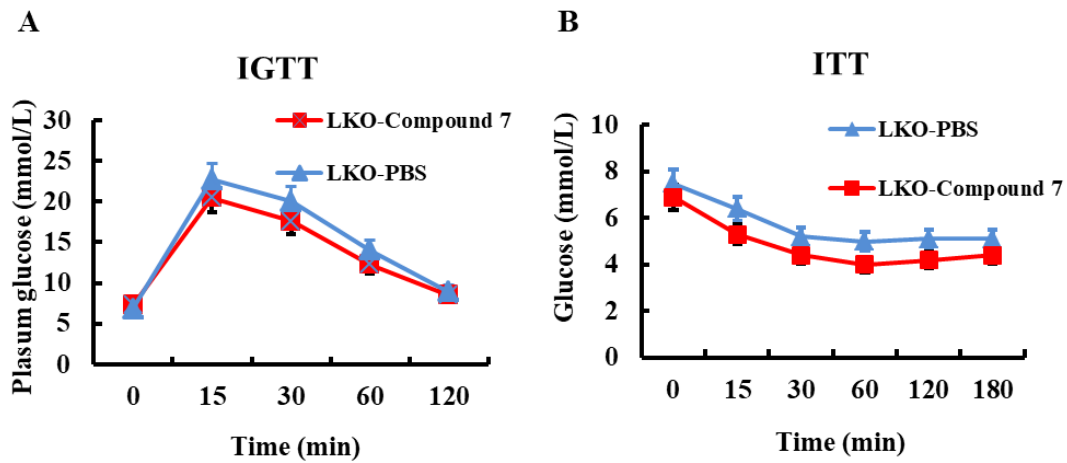

FIG. S4. IGTT and ITT in ERRα-LKO mice. (A) IGTT and (B) ITT have no obvious difference between JND003 and control group in ERRα-LKO mice on HFD.

**Control**

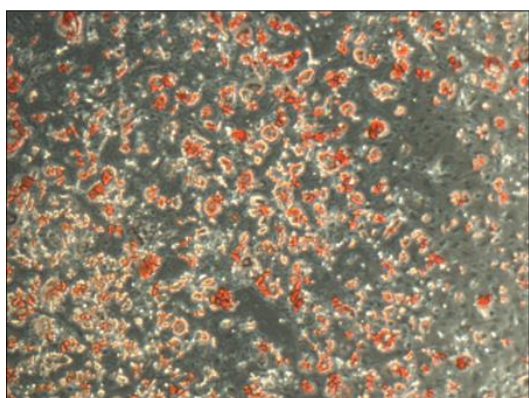

**Compound 7**

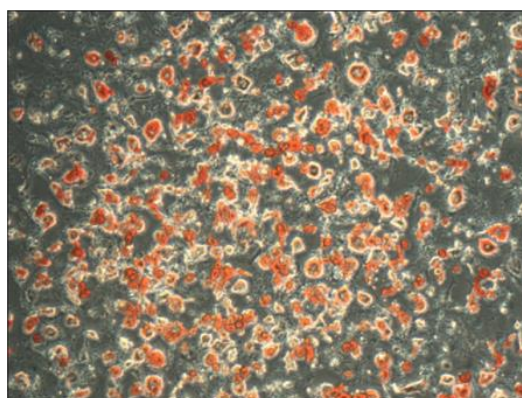

**FIG. S5. Compound 7 (JND003) has no obvious effect on the differentiation of adipocytes in 3T3L1 cell.**

**The  $^1\text{H}$  NMR spectra of compound 9:**

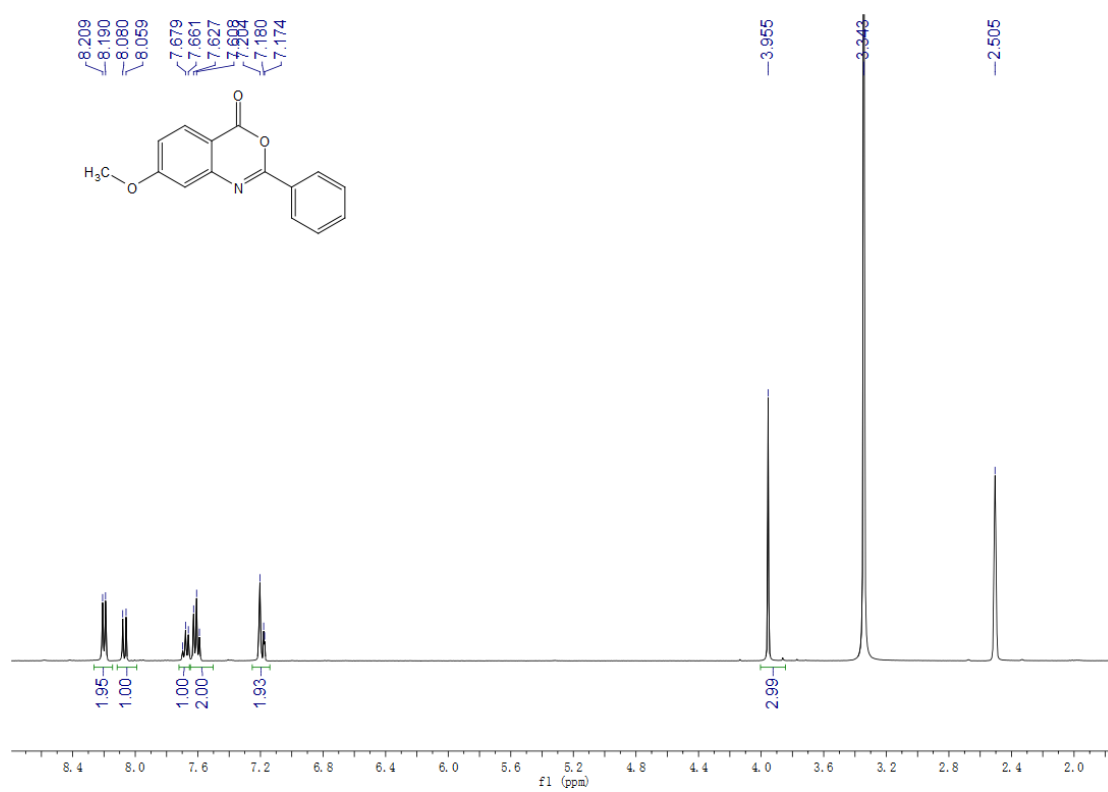

The  $^1\text{H}$  and  $^{13}\text{C}$  NMR spectra of compound JND003:

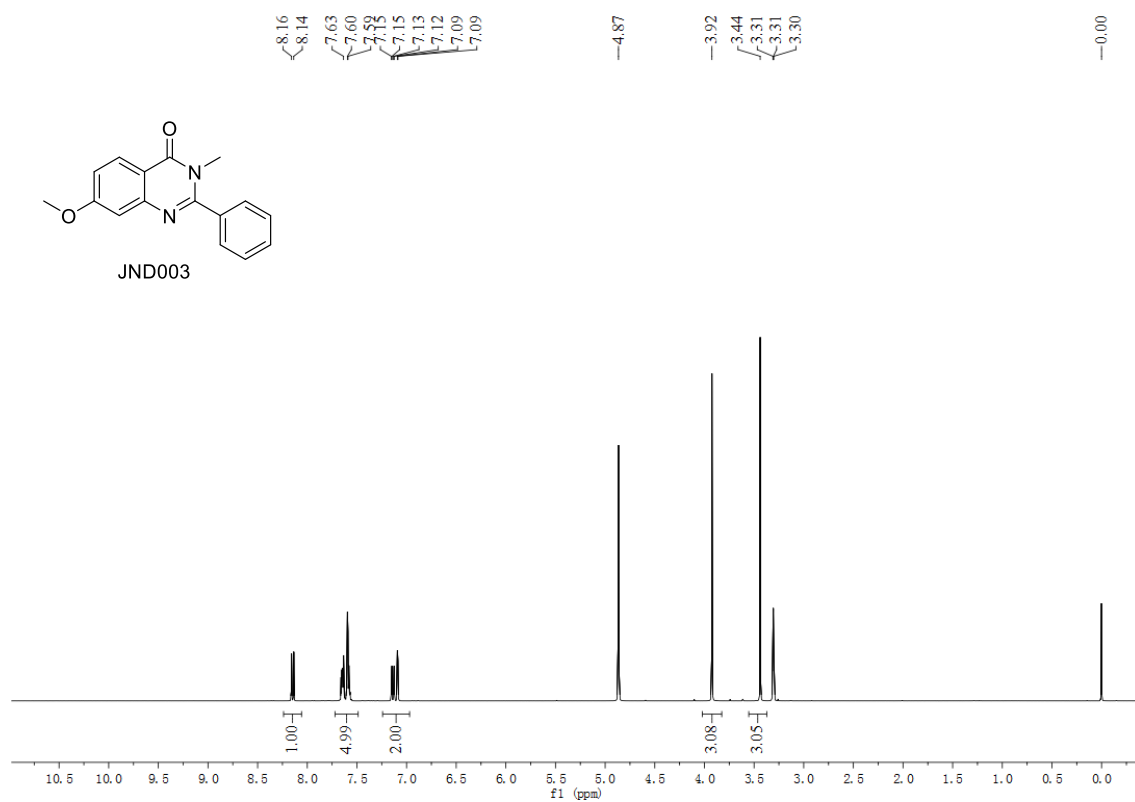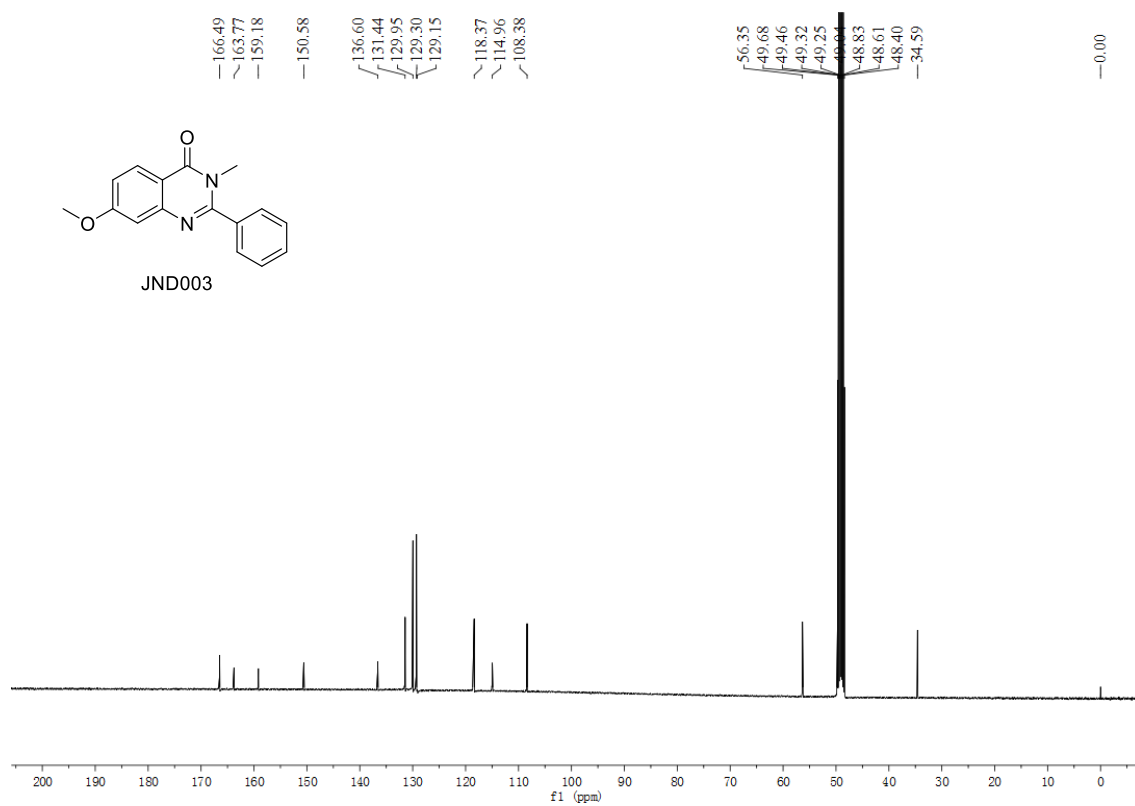

## HPLC Purity Analysis of compound JND003:

```

-----
Acq. Operator   : 系统
Sample Operator : 系统
Acq. Instrument : 1260LC                      Location : 1
Injection Date  : 03/06/2021 10:11:22
                                           Inj Volume : 3.000 µl

Acq. Method     : E:\DK\TL\方法80C-20D-30min-1u.M
Last changed    : 03/06/2021 10:10:28 by 系统
                 (modified after loading)
Analysis Method : C:\Chem32\1\Methods\DEF_LC.M
Last changed    : 23/06/2014 04:13:01 by SYSTEM
Additional Info  : Peak(s) manually integrated
  
```

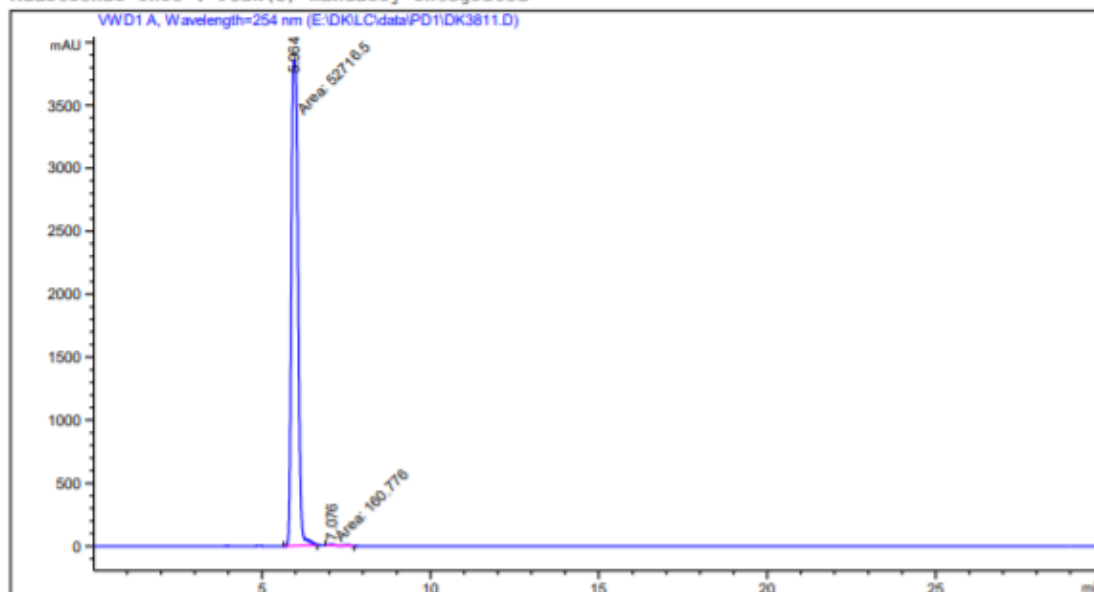

### Area Percent Report

```

-----
Sorted By      : Signal
Multiplier     : 1.0000
Dilution       : 1.0000
Sample Amount  : 10.00000 [ng/ul] (not used in calc.)
Use Multiplier & Dilution Factor with ISTDs
  
```

Signal 1: VWD1 A, Wavelength=254 nm

| Peak # | RetTime [min] | Type | Width [min] | Area [mAU*s] | Height [mAU] | Area %  |
|--------|---------------|------|-------------|--------------|--------------|---------|
| 1      | 5.964         | MM   | 0.2283      | 5.27165e4    | 3849.22583   | 99.6959 |
| 2      | 7.076         | MM   | 0.3338      | 160.77625    | 8.02716      | 0.3041  |

Totals : 5.28772e4 3857.25299



**Table S1. Pharmacokinetic parameters of compound 7 in SD rats<sup>a</sup>**

| Route           | T <sub>1/2</sub> (h) | C <sub>max</sub> (ng/mL) | AUC <sub>(0-∞)</sub><br>(h*ng/mL) | Cl (mL/h/kg)   | F (%)     |
|-----------------|----------------------|--------------------------|-----------------------------------|----------------|-----------|
| IV<br>(2mg/kg)  | 0.83±0.13            | 2125.44±439.00           | 857.18±68.62                      | 2342.96±182.23 | 9.03±2.66 |
| PO<br>(10mg/kg) | 0.74±0.07            | 531.03±120.31            | 382.57±110.38                     |                |           |

<sup>a</sup> SD rats (male, three animals per group) weighing 250-270 g were used for the study.

**Table S2. Tissue distribution of compound 7 in SD rats**

| Group 1- Compound 7-PO-30 mg/kg-Rat-Brain |                                        |       |       |       |       |
|-------------------------------------------|----------------------------------------|-------|-------|-------|-------|
| Time (h)                                  | Compound 7-Plasma Concentraion (ng/mL) |       |       | Mean  | SD    |
|                                           | 101                                    | 102   | 103   |       |       |
| 0.25                                      | 14.96                                  | 8.10  | 17.34 | 13.47 | 4.80  |
| 0.5                                       | 46.48                                  | 18.75 | 38.79 | 34.68 | 14.31 |
| 2                                         | 16.10                                  | 15.03 | 40.92 | 24.02 | 14.64 |
| 4                                         | 5.82                                   | 7.17  | 4.86  | 5.95  | 1.16  |
|                                           |                                        |       |       |       |       |
| Time (h)                                  | Compound -Brain Concentraion (ng/mL)   |       |       | Mean  | SD    |
|                                           | 101                                    | 102   | 103   |       |       |
| 0.25                                      | BLQ                                    | BLQ   | BLQ   | NA    | NA    |
| 0.5                                       | 2.01                                   | 1.36  | 2.19  | 1.85  | 0.44  |
| 2                                         | 1.02                                   | BLQ   | 2.61  | 1.82  | 1.12  |
| 4                                         | BLQ                                    | BLQ   | BLQ   | NA    | NA    |
|                                           |                                        |       |       |       |       |
| Time (h)                                  | COMPOUND 7-Brain Concentraion (ng/g*)  |       |       | Mean  | SD    |
|                                           | 101                                    | 102   | 103   |       |       |
| 0.25                                      | NA                                     | NA    | NA    | NA    | NA    |
| 0.5                                       | 22.07                                  | 14.95 | 24.12 | 20.38 | 4.82  |
| 2                                         | 11.27                                  | NA    | 28.74 | 20.00 | 12.36 |
| 4                                         | NA                                     | NA    | NA    | NA    | NA    |
|                                           |                                        |       |       |       |       |
| Time (h)                                  | Ratio-Brain tissue/Plasma              |       |       | Mean  | SD    |
|                                           | 101                                    | 102   | 103   |       |       |
| 0.25                                      | NA                                     | NA    | NA    | NA    | NA    |
| 0.5                                       | 0.47                                   | 0.80  | 0.62  | 0.63  | 0.16  |
| 2                                         | 0.70                                   | NA    | 0.70  | 0.70  | 0.00  |
| 4                                         | NA                                     | NA    | NA    | NA    | NA    |
|                                           |                                        |       |       |       |       |
| *, Detection value ×Dilution factor(11)   |                                        |       |       |       |       |
| NA=Not applicable                         |                                        |       |       |       |       |

| BLQ = Below the lower limit of quantitation (LLOQ) |                                        |       |       |       |       |
|----------------------------------------------------|----------------------------------------|-------|-------|-------|-------|
| Group 1- Compound 7-PO-30 mg/kg-Rat-Heart          |                                        |       |       |       |       |
| Time (h)                                           | Compound 7-Plasma Concentraion (ng/mL) |       |       | Mean  | SD    |
|                                                    | 101                                    | 102   | 103   |       |       |
| 0.25                                               | 14.96                                  | 8.10  | 17.34 | 13.47 | 4.80  |
| 0.5                                                | 46.48                                  | 18.75 | 38.79 | 34.68 | 14.31 |
| 2                                                  | 16.10                                  | 15.03 | 40.92 | 24.02 | 14.64 |
| 4                                                  | 5.82                                   | 7.17  | 4.86  | 5.95  | 1.16  |
|                                                    |                                        |       |       |       |       |
| Time (h)                                           | Compound 7-Heart Concentraion (ng/mL)  |       |       | Mean  | SD    |
|                                                    | 101                                    | 102   | 103   |       |       |
| 0.25                                               | BLQ                                    | BLQ   | BLQ   | NA    | NA    |
| 0.5                                                | 2.07                                   | 1.49  | 2.19  | 1.92  | 0.37  |
| 2                                                  | BLQ                                    | BLQ   | 2.81  | NA    | NA    |
| 4                                                  | BLQ                                    | BLQ   | BLQ   | NA    | NA    |
|                                                    |                                        |       |       |       |       |
| Time (h)                                           | Compound 7-Heart Concentraion (ng/g*)  |       |       | Mean  | SD    |
|                                                    | 101                                    | 102   | 103   |       |       |
| 0.25                                               | NA                                     | NA    | NA    | NA    | NA    |
| 0.5                                                | 22.73                                  | 16.44 | 24.14 | 21.10 | 4.10  |
| 2                                                  | NA                                     | NA    | 30.91 | NA    | NA    |
| 4                                                  | NA                                     | NA    | NA    | NA    | NA    |
|                                                    |                                        |       |       |       |       |
| Time (h)                                           | Ratio-Hearttissue/Plasma               |       |       | Mean  | SD    |
|                                                    | 101                                    | 102   | 103   |       |       |
| 0.25                                               | NA                                     | NA    | MA    | NA    | NA    |
| 0.5                                                | 0.49                                   | 0.88  | 0.62  | 0.66  | 0.20  |
| 2                                                  | NA                                     | NA    | 0.76  | NA    | NA    |
| 4                                                  | NA                                     | NA    | NA    | NA    | NA    |
| *, Detection value ×Dilution factor(11)            |                                        |       |       |       |       |
| NA=Not applicable                                  |                                        |       |       |       |       |
| BLQ = Below the lower limit of quantitation (LLOQ) |                                        |       |       |       |       |

| Group 1- Compound 7-PO-30 mg/kg-Rat-Lung |                                        |       |       |       |       |
|------------------------------------------|----------------------------------------|-------|-------|-------|-------|
| Time (h)                                 | Compound 7-Plasma Concentraion (ng/mL) |       |       | Mean  | SD    |
|                                          | 101                                    | 102   | 103   |       |       |
| 0.25                                     | 14.96                                  | 8.10  | 17.34 | 13.47 | 4.80  |
| 0.5                                      | 46.48                                  | 18.75 | 38.79 | 34.68 | 14.31 |
| 2                                        | 16.10                                  | 15.03 | 40.92 | 24.02 | 14.64 |
| 4                                        | 5.82                                   | 7.17  | 4.86  | 5.95  | 1.16  |
|                                          |                                        |       |       |       |       |

| Time (h)                                           | Compound 7-Lung Concentraion (ng/mL) |       |       | Mean  | SD    |
|----------------------------------------------------|--------------------------------------|-------|-------|-------|-------|
|                                                    | 101                                  | 102   | 103   |       |       |
| 0.25                                               | 1.38                                 | BLQ   | 1.40  | 1.39  | 0.01  |
| 0.5                                                | 2.82                                 | 1.75  | 2.94  | 2.50  | 0.65  |
| 2                                                  | 1.33                                 | 1.42  | 3.64  | 2.13  | 1.31  |
| 4                                                  | BLQ                                  | BLQ   | BLQ   | NA    | NA    |
|                                                    |                                      |       |       |       |       |
| Time (h)                                           | Compound 7-Lung Concentraion (ng/g*) |       |       | Mean  | SD    |
|                                                    | 101                                  | 102   | 103   |       |       |
| 0.25                                               | 15.19                                | NA    | 15.41 | 15.30 | 0.16  |
| 0.5                                                | 31.04                                | 19.27 | 32.30 | 27.54 | 7.18  |
| 2                                                  | 14.64                                | 15.62 | 40.01 | 23.43 | 14.37 |
| 4                                                  | NA                                   | NA    | NA    | NA    | NA    |
|                                                    |                                      |       |       |       |       |
| Time (h)                                           | Ratio-Lungtissue/Plasma              |       |       | Mean  | SD    |
|                                                    | 101                                  | 102   | 103   |       |       |
| 0.25                                               | 1.02                                 | NA    | 0.89  | 0.95  | 0.09  |
| 0.5                                                | 0.67                                 | 1.03  | 0.83  | 0.84  | 0.18  |
| 2                                                  | 0.91                                 | 1.04  | 0.98  | 0.98  | 0.06  |
| 4                                                  | NA                                   | NA    | NA    | NA    | NA    |
|                                                    |                                      |       |       |       |       |
| *, Detection value ×Dilution factor(11)            |                                      |       |       |       |       |
| NA=Not applicable                                  |                                      |       |       |       |       |
| BLQ = Below the lower limit of quantitation (LLOQ) |                                      |       |       |       |       |

| Group 1- Compound 7-PO-30 mg/kg-Rat-Liver |                                        |        |        |        |        |
|-------------------------------------------|----------------------------------------|--------|--------|--------|--------|
| Time (h)                                  | Compound 7-Plasma Concentraion (ng/mL) |        |        | Mean   | SD     |
|                                           | 101                                    | 102    | 103    |        |        |
| 0.25                                      | 14.96                                  | 8.10   | 17.34  | 13.47  | 4.80   |
| 0.5                                       | 46.48                                  | 18.75  | 38.79  | 34.68  | 14.31  |
| 2                                         | 16.10                                  | 15.03  | 40.92  | 24.02  | 14.64  |
| 4                                         | 5.82                                   | 7.17   | 4.86   | 5.95   | 1.16   |
|                                           |                                        |        |        |        |        |
| Time (h)                                  | Compound 7-Liver Concentraion (ng/mL)  |        |        | Mean   | SD     |
|                                           | 101                                    | 102    | 103    |        |        |
| 0.25                                      | 75.03                                  | 63.63  | 55.47  | 64.71  | 9.83   |
| 0.5                                       | 72.71                                  | 121.75 | 108.11 | 100.86 | 25.31  |
| 2                                         | 59.77                                  | 47.57  | 37.92  | 48.42  | 10.95  |
| 4                                         | 17.27                                  | 31.91  | 26.77  | 25.31  | 7.43   |
|                                           |                                        |        |        |        |        |
| Time (h)                                  | Compound 7-Liver Concentraion (ng/g*)  |        |        | Mean   | SD     |
|                                           | 101                                    | 102    | 103    |        |        |
| 0.25                                      | 825.33                                 | 699.88 | 610.14 | 711.78 | 108.09 |

|                                                    |                           |            |            |             |           |
|----------------------------------------------------|---------------------------|------------|------------|-------------|-----------|
| 0.5                                                | 799.82                    | 1339.23    | 1189.21    | 1109.42     | 278.42    |
| 2                                                  | 657.47                    | 523.29     | 417.10     | 532.62      | 120.46    |
| 4                                                  | 189.97                    | 350.96     | 294.42     | 278.45      | 81.68     |
|                                                    |                           |            |            |             |           |
| Time (h)                                           | Ratio-Liver tissue/Plasma |            |            | <b>Mean</b> | <b>SD</b> |
|                                                    | <b>101</b>                | <b>102</b> | <b>103</b> |             |           |
| 0.25                                               | 55.17                     | 86.43      | 35.18      | 58.93       | 25.83     |
| 0.5                                                | 17.21                     | 71.41      | 30.65      | 39.76       | 28.23     |
| 2                                                  | 40.84                     | 34.81      | 10.19      | 28.61       | 16.23     |
| 4                                                  | 32.65                     | 48.95      | 60.61      | 47.40       | 14.04     |
| *, Detection value ×Dilution factor(11)            |                           |            |            |             |           |
| NA=Not applicable                                  |                           |            |            |             |           |
| BLQ = Below the lower limit of quantitation (LLOQ) |                           |            |            |             |           |

| Group 1- Compound 7-PO-30 mg/kg-Rat-Stomach |                                         |            |            |             |           |
|---------------------------------------------|-----------------------------------------|------------|------------|-------------|-----------|
| Time (h)                                    | Compound 7-Plasma Concentraion (ng/mL)  |            |            | <b>Mean</b> | <b>SD</b> |
|                                             | <b>101</b>                              | <b>102</b> | <b>103</b> |             |           |
| 0.25                                        | 14.96                                   | 8.10       | 17.34      | 13.47       | 4.80      |
| 0.5                                         | 46.48                                   | 18.75      | 38.79      | 34.68       | 14.31     |
| 2                                           | 16.10                                   | 15.03      | 40.92      | 24.02       | 14.64     |
| 4                                           | 5.82                                    | 7.17       | 4.86       | 5.95        | 1.16      |
|                                             |                                         |            |            |             |           |
| Time (h)                                    | Compound 7-Stomach Concentraion (ng/mL) |            |            | <b>Mean</b> | <b>SD</b> |
|                                             | <b>101</b>                              | <b>102</b> | <b>103</b> |             |           |
| 0.25                                        | 800.02                                  | 754.96     | 914.02     | 823.00      | 81.99     |
| 0.5                                         | 1515.69                                 | 909.17     | 1335.91    | 1253.59     | 311.52    |
| 2                                           | 36.28                                   | 235.44     | 102.77     | 124.83      | 101.40    |
| 4                                           | 9.10                                    | 16.96      | 7.66       | 11.24       | 5.00      |
|                                             |                                         |            |            |             |           |
| Time (h)                                    | Compound 7-Stomach Concentraion (ng/g*) |            |            | <b>Mean</b> | <b>SD</b> |
|                                             | <b>101</b>                              | <b>102</b> | <b>103</b> |             |           |
| 0.25                                        | 8800.19                                 | 8304.51    | 10054.25   | 9052.98     | 901.85    |
| 0.5                                         | 16672.59                                | 10000.91   | 14695.01   | 13789.50    | 3426.77   |
| 2                                           | 399.05                                  | 2589.83    | 1130.51    | 1373.13     | 1115.36   |
| 4                                           | 100.14                                  | 186.53     | 84.27      | 123.65      | 55.04     |
|                                             |                                         |            |            |             |           |
| Time (h)                                    | Ratio-Stomach tissue/Plasma             |            |            | <b>Mean</b> | <b>SD</b> |
|                                             | <b>101</b>                              | <b>102</b> | <b>103</b> |             |           |
| 0.25                                        | 588.27                                  | 1025.51    | 579.68     | 731.15      | 254.96    |
| 0.5                                         | 358.72                                  | 533.28     | 378.80     | 423.60      | 95.52     |
| 2                                           | 24.79                                   | 172.26     | 27.63      | 74.89       | 84.34     |

|                                                    |       |       |       |       |      |
|----------------------------------------------------|-------|-------|-------|-------|------|
| 4                                                  | 17.21 | 26.02 | 17.35 | 20.19 | 5.05 |
| *, Detection value ×Dilution factor(11)            |       |       |       |       |      |
| NA=Not applicable                                  |       |       |       |       |      |
| BLQ = Below the lower limit of quantitation (LLOQ) |       |       |       |       |      |

| Group 1- Compound 7-PO-30 mg/kg-Rat-Spleen         |                                        |       |        |        |        |
|----------------------------------------------------|----------------------------------------|-------|--------|--------|--------|
| Time (h)                                           | Compound 7-Plasma Concentraion (ng/mL) |       |        | Mean   | SD     |
|                                                    | 101                                    | 102   | 103    |        |        |
| 0.25                                               | 14.96                                  | 8.10  | 17.34  | 13.47  | 4.80   |
| 0.5                                                | 46.48                                  | 18.75 | 38.79  | 34.68  | 14.31  |
| 2                                                  | 16.10                                  | 15.03 | 40.92  | 24.02  | 14.64  |
| 4                                                  | 5.82                                   | 7.17  | 4.86   | 5.95   | 1.16   |
|                                                    |                                        |       |        |        |        |
| Time (h)                                           | Compound 7-Spleen Concentraion (ng/mL) |       |        | Mean   | SD     |
|                                                    | 101                                    | 102   | 103    |        |        |
| 0.25                                               | 6.55                                   | 4.14  | 11.89  | 7.53   | 3.97   |
| 0.5                                                | 4.89                                   | 8.49  | 22.96  | 12.11  | 9.57   |
| 2                                                  | 1.78                                   | BLQ   | 2.94   | 2.36   | 0.81   |
| 4                                                  | 4.53                                   | 7.73  | BLQ    | 6.13   | 2.27   |
|                                                    |                                        |       |        |        |        |
| Time (h)                                           | Compound 7-Spleen Concentraion (ng/g*) |       |        | Mean   | SD     |
|                                                    | 101                                    | 102   | 103    |        |        |
| 0.25                                               | 72.01                                  | 45.53 | 130.83 | 82.79  | 43.66  |
| 0.5                                                | 53.78                                  | 93.35 | 252.61 | 133.24 | 105.25 |
| 2                                                  | 19.61                                  | NA    | 32.29  | 25.95  | 8.96   |
| 4                                                  | 49.78                                  | 85.06 | NA     | 67.42  | 24.95  |
|                                                    |                                        |       |        |        |        |
| Time (h)                                           | Ratio-Spleen tissue/Plasma             |       |        | Mean   | SD     |
|                                                    | 101                                    | 102   | 103    |        |        |
| 0.25                                               | 4.81                                   | 5.62  | 7.54   | 5.99   | 1.40   |
| 0.5                                                | 1.16                                   | 4.98  | 6.51   | 4.22   | 2.76   |
| 2                                                  | 1.22                                   | NA    | 0.79   | 1.00   | 0.30   |
| 4                                                  | 8.56                                   | 11.86 | NA     | 10.21  | 2.34   |
|                                                    |                                        |       |        |        |        |
| *, Detection value ×Dilution factor(11)            |                                        |       |        |        |        |
| NA=Not applicable                                  |                                        |       |        |        |        |
| BLQ = Below the lower limit of quantitation (LLOQ) |                                        |       |        |        |        |

| Group 1- Compound 7-PO-30 mg/kg-Rat-Kindeg         |                                          |       |        |        |       |
|----------------------------------------------------|------------------------------------------|-------|--------|--------|-------|
| Time (h)                                           | Compound 7-Plasma Concentration (ng/mL)  |       |        | Mean   | SD    |
|                                                    | 101                                      | 102   | 103    |        |       |
| 0.25                                               | 14.96                                    | 8.10  | 17.34  | 13.47  | 4.80  |
| 0.5                                                | 46.48                                    | 18.75 | 38.79  | 34.68  | 14.31 |
| 2                                                  | 16.10                                    | 15.03 | 40.92  | 24.02  | 14.64 |
| 4                                                  | 5.82                                     | 7.17  | 4.86   | 5.95   | 1.16  |
|                                                    |                                          |       |        |        |       |
| Time (h)                                           | Compound 7- Kindeg Concentration (ng/mL) |       |        | Mean   | SD    |
|                                                    | 101                                      | 102   | 103    |        |       |
| 0.25                                               | 5.31                                     | 6.18  | 2.95   | 4.81   | 1.67  |
| 0.5                                                | 9.53                                     | 5.60  | 16.22  | 10.45  | 5.37  |
| 2                                                  | 4.11                                     | 3.34  | 11.63  | 6.36   | 4.58  |
| 4                                                  | 3.39                                     | 6.05  | 2.18   | 3.87   | 1.98  |
|                                                    |                                          |       |        |        |       |
| Time (h)                                           | Compound 7- Kindeg Concentration (ng/g*) |       |        | Mean   | SD    |
|                                                    | 101                                      | 102   | 103    |        |       |
| 0.25                                               | 58.45                                    | 67.97 | 32.40  | 52.94  | 18.42 |
| 0.5                                                | 104.87                                   | 61.56 | 178.45 | 114.96 | 59.10 |
| 2                                                  | 45.21                                    | 36.72 | 127.88 | 69.94  | 50.36 |
| 4                                                  | 37.28                                    | 66.53 | 24.01  | 42.61  | 21.76 |
|                                                    |                                          |       |        |        |       |
| Time (h)                                           | Ratio-Kindeg tissue/Plasma               |       |        | Mean   | SD    |
|                                                    | 101                                      | 102   | 103    |        |       |
| 0.25                                               | 3.91                                     | 8.39  | 1.87   | 4.72   | 3.34  |
| 0.5                                                | 2.26                                     | 3.28  | 4.60   | 3.38   | 1.17  |
| 2                                                  | 2.81                                     | 2.44  | 3.13   | 2.79   | 0.34  |
| 4                                                  | 6.41                                     | 9.28  | 4.94   | 6.88   | 2.21  |
|                                                    |                                          |       |        |        |       |
| *, Detection value ×Dilution factor(11)            |                                          |       |        |        |       |
| NA=Not applicable                                  |                                          |       |        |        |       |
| BLQ = Below the lower limit of quantitation (LLOQ) |                                          |       |        |        |       |

| Group 1- Compound 7-PO-30 mg/kg-Rat-Addominal fat  |                                               |         |        |         |         |
|----------------------------------------------------|-----------------------------------------------|---------|--------|---------|---------|
| Time (h)                                           | Compound 7-Plasma Concentraion (ng/mL)        |         |        | Mean    | SD      |
|                                                    | 101                                           | 102     | 103    |         |         |
| 0.25                                               | 14.96                                         | 8.10    | 17.34  | 13.47   | 4.80    |
| 0.5                                                | 46.48                                         | 18.75   | 38.79  | 34.68   | 14.31   |
| 2                                                  | 16.10                                         | 15.03   | 40.92  | 24.02   | 14.64   |
| 4                                                  | 5.82                                          | 7.17    | 4.86   | 5.95    | 1.16    |
|                                                    |                                               |         |        |         |         |
| Time (h)                                           | Compound 7-Addominal fat Concentraion (ng/mL) |         |        | Mean    | SD      |
|                                                    | 101                                           | 102     | 103    |         |         |
| 0.25                                               | 7.09                                          | BLQ     | 15.02  | 11.06   | 5.60    |
| 0.5                                                | 11.26                                         | 144.28  | 10.38  | 55.31   | 77.06   |
| 2                                                  | 57.63                                         | 26.93   | 34.98  | 39.85   | 15.92   |
| 4                                                  | 266.50                                        | 74.60   | 38.04  | 126.38  | 122.72  |
|                                                    |                                               |         |        |         |         |
| Time (h)                                           | Compound 7-Addominal fat Concentraion (ng/g*) |         |        | Mean    | SD      |
|                                                    | 101                                           | 102     | 103    |         |         |
| 0.25                                               | 78.04                                         | NA      | 165.18 | 121.61  | 61.62   |
| 0.5                                                | 123.81                                        | 1587.10 | 114.21 | 608.37  | 847.62  |
| 2                                                  | 633.97                                        | 296.22  | 384.79 | 438.32  | 175.13  |
| 4                                                  | 2931.54                                       | 820.57  | 418.41 | 1390.17 | 1349.93 |
|                                                    |                                               |         |        |         |         |
| Time (h)                                           | Ratio-Addominal fat tissue/Plasma             |         |        | Mean    | SD      |
|                                                    | 101                                           | 102     | 103    |         |         |
| 0.25                                               | 5.22                                          | NA      | 9.52   | 7.37    | 3.05    |
| 0.5                                                | 2.66                                          | 84.63   | 2.94   | 30.08   | 47.24   |
| 2                                                  | 39.38                                         | 19.70   | 9.40   | 22.83   | 15.23   |
| 4                                                  | 503.84                                        | 114.45  | 86.13  | 234.80  | 233.42  |
|                                                    |                                               |         |        |         |         |
| *, Detection value ×Dilution factor(11)            |                                               |         |        |         |         |
| NA=Not applicable                                  |                                               |         |        |         |         |
| BLQ = Below the lower limit of quantitation (LLOQ) |                                               |         |        |         |         |

| Group 1- Compound 7-PO-30 mg/kg-Rat-Bladder        |                                         |       |        |        |        |
|----------------------------------------------------|-----------------------------------------|-------|--------|--------|--------|
| Time (h)                                           | Compound 7-Plasma Concentraion (ng/mL)  |       |        | Mean   | SD     |
|                                                    | 101                                     | 102   | 103    |        |        |
| 0.25                                               | 14.96                                   | 8.10  | 17.34  | 13.47  | 4.80   |
| 0.5                                                | 46.48                                   | 18.75 | 38.79  | 34.68  | 14.31  |
| 2                                                  | 16.10                                   | 15.03 | 40.92  | 24.02  | 14.64  |
| 4                                                  | 5.82                                    | 7.17  | 4.86   | 5.95   | 1.16   |
|                                                    |                                         |       |        |        |        |
| Time (h)                                           | Compound 7-Bladder Concentraion (ng/mL) |       |        | Mean   | SD     |
|                                                    | 101                                     | 102   | 103    |        |        |
| 0.25                                               | BLQ                                     | BLQ   | 6.50   | NA     | NA     |
| 0.5                                                | 5.83                                    | 3.65  | 18.83  | 9.44   | 8.21   |
| 2                                                  | 31.36                                   | 3.53  | 7.22   | 14.04  | 15.11  |
| 4                                                  | 62.28                                   | 3.00  | 8.92   | 24.73  | 32.65  |
|                                                    |                                         |       |        |        |        |
| Time (h)                                           | Compound 7-Bladder Concentraion (ng/g*) |       |        | Mean   | SD     |
|                                                    | 101                                     | 102   | 103    |        |        |
| 0.25                                               | NA                                      | NA    | 71.50  | NA     | NA     |
| 0.5                                                | 64.08                                   | 40.13 | 207.16 | 103.79 | 90.32  |
| 2                                                  | 344.93                                  | 38.78 | 79.47  | 154.39 | 166.26 |
| 4                                                  | 685.06                                  | 33.02 | 98.14  | 272.07 | 359.14 |
|                                                    |                                         |       |        |        |        |
| Time (h)                                           | Ratio-Bladder tissue/Plasma             |       |        | Mean   | SD     |
|                                                    | 101                                     | 102   | 103    |        |        |
| 0.25                                               | NA                                      | NA    | 4.12   | NA     | NA     |
| 0.5                                                | 1.38                                    | 2.14  | 5.34   | 2.95   | 2.10   |
| 2                                                  | 21.42                                   | 2.58  | 1.94   | 8.65   | 11.07  |
| 4                                                  | 117.74                                  | 4.61  | 20.20  | 47.52  | 61.31  |
|                                                    |                                         |       |        |        |        |
| *, Detection value ×Dilution factor(11)            |                                         |       |        |        |        |
| NA=Not applicable                                  |                                         |       |        |        |        |
| BLQ = Below the lower limit of quantitation (LLOQ) |                                         |       |        |        |        |



| Group 1-Compound 7-PO-30 mg/kg-Rat-Large intestine |                                                 |          |          |          |          |
|----------------------------------------------------|-------------------------------------------------|----------|----------|----------|----------|
| Time (h)                                           | Compound 7-Plasma Concentraion (ng/mL)          |          |          | Mean     | SD       |
|                                                    | 101                                             | 102      | 103      |          |          |
| 0.25                                               | 14.96                                           | 8.10     | 17.34    | 13.47    | 4.80     |
| 0.5                                                | 46.48                                           | 18.75    | 38.79    | 34.68    | 14.31    |
| 2                                                  | 16.10                                           | 15.03    | 40.92    | 24.02    | 14.64    |
| 4                                                  | 5.82                                            | 7.17     | 4.86     | 5.95     | 1.16     |
|                                                    |                                                 |          |          |          |          |
| Time (h)                                           | Compound 7-Large intestine Concentraion (ng/mL) |          |          | Mean     | SD       |
|                                                    | 101                                             | 102      | 103      |          |          |
| 0.25                                               | 14.06                                           | 16.13    | 14.82    | 15.00    | 1.05     |
| 0.5                                                | 68.91                                           | 16.05    | 17.40    | 34.12    | 30.14    |
| 2                                                  | 80.07                                           | 375.07   | 1043.63  | 499.59   | 493.70   |
| 4                                                  | 2942.78                                         | 3083.01  | 5569.47  | 3865.09  | 1477.70  |
|                                                    |                                                 |          |          |          |          |
| Time (h)                                           | Compound 7-Large intestine Concentraion (ng/g*) |          |          | Mean     | SD       |
|                                                    | 101                                             | 102      | 103      |          |          |
| 0.25                                               | 154.62                                          | 177.39   | 162.98   | 165.00   | 11.52    |
| 0.5                                                | 758.04                                          | 176.53   | 191.36   | 375.31   | 331.54   |
| 2                                                  | 880.80                                          | 4125.75  | 11479.93 | 5495.49  | 5430.70  |
| 4                                                  | 32370.58                                        | 33913.11 | 61264.17 | 42515.95 | 16254.74 |
|                                                    |                                                 |          |          |          |          |
| Time (h)                                           | Ratio-Large intestine tissue/Plasma             |          |          | Mean     | SD       |
|                                                    | 101                                             | 102      | 103      |          |          |
| 0.25                                               | 10.34                                           | 21.91    | 9.40     | 13.88    | 6.97     |
| 0.5                                                | 16.31                                           | 9.41     | 4.93     | 10.22    | 5.73     |
| 2                                                  | 54.71                                           | 274.42   | 280.57   | 203.23   | 128.66   |
| 4                                                  | 5563.43                                         | 4730.09  | 12611.04 | 7634.85  | 4329.60  |
|                                                    |                                                 |          |          |          |          |
| *, Detection value ×Dilution factor(11)            |                                                 |          |          |          |          |
| NA=Not applicable                                  |                                                 |          |          |          |          |
| BLQ = Below the lower limit of quantitation (LLOQ) |                                                 |          |          |          |          |

| Group 1- Compound 7-PO-30 mg/kg-Rat-Skeletal muscle |                                                  |       |       |       |       |
|-----------------------------------------------------|--------------------------------------------------|-------|-------|-------|-------|
| Time (h)                                            | Compound 7-Plasma Concentraion (ng/mL)           |       |       | Mean  | SD    |
|                                                     | 101                                              | 102   | 103   |       |       |
| 0.25                                                | 14.96                                            | 8.10  | 17.34 | 13.47 | 4.80  |
| 0.5                                                 | 46.48                                            | 18.75 | 38.79 | 34.68 | 14.31 |
| 2                                                   | 16.10                                            | 15.03 | 40.92 | 24.02 | 14.64 |
| 4                                                   | 5.82                                             | 7.17  | 4.86  | 5.95  | 1.16  |
|                                                     |                                                  |       |       |       |       |
| Time (h)                                            | Compound 7- Skeletal muscle Concentraion (ng/mL) |       |       | Mean  | SD    |
|                                                     | 101                                              | 102   | 103   |       |       |
| 0.25                                                | BLQ                                              | BLQ   | BLQ   | NA    | NA    |
| 0.5                                                 | 1.06                                             | BLQ   | 1.14  | 1.10  | 0.06  |
| 2                                                   | BLQ                                              | BLQ   | 1.64  | NA    | NA    |
| 4                                                   | BLQ                                              | BLQ   | BLQ   | NA    | NA    |
|                                                     |                                                  |       |       |       |       |
| Time (h)                                            | Compound 7- Skeletal muscle Concentraion (ng/g*) |       |       | Mean  | SD    |
|                                                     | 101                                              | 102   | 103   |       |       |
| 0.25                                                | NA                                               | NA    | NA    | NA    | NA    |
| 0.5                                                 | 11.67                                            | NA    | 12.58 | 12.12 | 0.64  |
| 2                                                   | NA                                               | NA    | 18.09 | NA    | NA    |
| 4                                                   | NA                                               | NA    | NA    | NA    | NA    |
|                                                     |                                                  |       |       |       |       |
| Time (h)                                            | Ratio-Skeletal muscle tissue/Plasma              |       |       | Mean  | SD    |
|                                                     | 101                                              | 102   | 103   |       |       |
| 0.25                                                | NA                                               | NA    | NA    | NA    | NA    |
| 0.5                                                 | 0.25                                             | NA    | 0.32  | 0.29  | 0.05  |
| 2                                                   | NA                                               | NA    | 0.44  | NA    | NA    |
| 4                                                   | NA                                               | NA    | NA    | NA    | NA    |
|                                                     |                                                  |       |       |       |       |
| *, Detection value ×Dilution factor(11)             |                                                  |       |       |       |       |
| NA=Not applicable                                   |                                                  |       |       |       |       |
| BLQ = Below the lower limit of quantitation (LLOQ)  |                                                  |       |       |       |       |

| Group 1- Compound 7-PO-30 mg/kg-Rat-Small intestine |                                                 |           |           |           |           |
|-----------------------------------------------------|-------------------------------------------------|-----------|-----------|-----------|-----------|
| Time (h)                                            | Compound 7-Plasma Concentraion (ng/mL)          |           |           | Mean      | SD        |
|                                                     | 101                                             | 102       | 103       |           |           |
| 0.25                                                | 14.96                                           | 8.10      | 17.34     | 13.47     | 4.80      |
| 0.5                                                 | 46.48                                           | 18.75     | 38.79     | 34.68     | 14.31     |
| 2                                                   | 16.10                                           | 15.03     | 40.92     | 24.02     | 14.64     |
| 4                                                   | 5.82                                            | 7.17      | 4.86      | 5.95      | 1.16      |
|                                                     |                                                 |           |           |           |           |
| Time (h)                                            | Compound 7-Small intestine Concentraion (ng/mL) |           |           | Mean      | SD        |
|                                                     | 101                                             | 102       | 103       |           |           |
| 0.25                                                | 4138.72                                         | 53015.02  | 1585.33   | 19579.69  | 28983.98  |
| 0.5                                                 | 47887.50                                        | 3516.82   | 30472.97  | 27292.43  | 22355.67  |
| 2                                                   | 1894.77                                         | 3337.01   | 8655.74   | 4629.17   | 3560.89   |
| 4                                                   | 744.28                                          | 2585.52   | 45.16     | 1124.99   | 1312.28   |
|                                                     |                                                 |           |           |           |           |
| Time (h)                                            | Compound 7-Small intestine Concentraion (ng/g*) |           |           | Mean      | SD        |
|                                                     | 101                                             | 102       | 103       |           |           |
| 0.25                                                | 45525.87                                        | 583165.22 | 17438.62  | 215376.57 | 318823.76 |
| 0.5                                                 | 526762.50                                       | 38685.04  | 335202.67 | 300216.74 | 245912.41 |
| 2                                                   | 20842.50                                        | 36707.14  | 95213.09  | 50920.91  | 39169.75  |
| 4                                                   | 8187.06                                         | 28440.75  | 496.75    | 12374.85  | 14435.03  |
|                                                     |                                                 |           |           |           |           |
| Time (h)                                            | Ratio-Small intestinetissue/Plasma              |           |           | Mean      | SD        |
|                                                     | 101                                             | 102       | 103       |           |           |
| 0.25                                                | 3043.27                                         | 72014.29  | 1005.43   | 25354.33  | 40421.55  |
| 0.5                                                 | 11333.56                                        | 2062.82   | 8640.62   | 7345.67   | 4769.11   |
| 2                                                   | 1294.55                                         | 2441.54   | 2327.04   | 2021.05   | 631.76    |
| 4                                                   | 1407.08                                         | 3966.82   | 102.25    | 1825.39   | 1965.95   |
|                                                     |                                                 |           |           |           |           |
| *, Detection value ×Dilution factor(11)             |                                                 |           |           |           |           |
| NA=Not applicable                                   |                                                 |           |           |           |           |
| BLQ = Below the lower limit of quantitation (LLOQ)  |                                                 |           |           |           |           |

| Group 1- Compound 7-PO-30 mg/kg-Rat-Testis         |                                         |       |       |       |       |
|----------------------------------------------------|-----------------------------------------|-------|-------|-------|-------|
| Time (h)                                           | Compound 7-Plasma Concentration (ng/mL) |       |       | Mean  | SD    |
|                                                    | 101                                     | 102   | 103   |       |       |
| 0.25                                               | 14.96                                   | 8.10  | 17.34 | 13.47 | 4.80  |
| 0.5                                                | 46.48                                   | 18.75 | 38.79 | 34.68 | 14.31 |
| 2                                                  | 16.10                                   | 15.03 | 40.92 | 24.02 | 14.64 |
| 4                                                  | 5.82                                    | 7.17  | 4.86  | 5.95  | 1.16  |
|                                                    |                                         |       |       |       |       |
| Time (h)                                           | Compound 7-Testis Concentration (ng/mL) |       |       | Mean  | SD    |
|                                                    | 101                                     | 102   | 103   |       |       |
| 0.25                                               | 1.09                                    | BLQ   | BLQ   | NA    | NA    |
| 0.5                                                | 2.12                                    | 5.20  | 1.52  | 2.95  | 1.97  |
| 2                                                  | 2.26                                    | 3.46  | 3.07  | 2.93  | 0.61  |
| 4                                                  | BLQ                                     | 7.20  | BLQ   | NA    | NA    |
|                                                    |                                         |       |       |       |       |
| Time (h)                                           | Compound 7-Testis Concentration (ng/g*) |       |       | Mean  | SD    |
|                                                    | 101                                     | 102   | 103   |       |       |
| 0.25                                               | 12.00                                   | NA    | NA    | NA    | NA    |
| 0.5                                                | 23.30                                   | 57.20 | 16.74 | 32.41 | 21.71 |
| 2                                                  | 24.90                                   | 38.02 | 33.72 | 32.22 | 6.69  |
| 4                                                  | NA                                      | 79.17 | NA    | NA    | NA    |
|                                                    |                                         |       |       |       |       |
| Time (h)                                           | Ratio-Testis tissue/Plasma              |       |       | Mean  | SD    |
|                                                    | 101                                     | 102   | 103   |       |       |
| 0.25                                               | 0.80                                    | NA    | NA    | NA    | NA    |
| 0.5                                                | 0.50                                    | 3.05  | 0.43  | 1.33  | 1.49  |
| 2                                                  | 1.55                                    | 2.53  | 0.82  | 1.63  | 0.86  |
| 4                                                  | NA                                      | 11.04 | NA    | NA    | NA    |
|                                                    |                                         |       |       |       |       |
| *, Detection value ×Dilution factor(11)            |                                         |       |       |       |       |
| NA=Not applicable                                  |                                         |       |       |       |       |
| BLQ = Below the lower limit of quantitation (LLOQ) |                                         |       |       |       |       |

**Table S2. Primers used for quantitative PCR**

| <b>Gene</b>          | <b>Accession number</b> |   | <b>Sequence (5'-3')</b> |
|----------------------|-------------------------|---|-------------------------|
| <i>Cox II</i>        | AF378830                | F | AATTGCTCTCCCCTCTCTACG   |
|                      |                         | R | GTAGCTTCAGTATCATTGGTGC  |
| <i>Cs</i>            | NM_026444               | F | CTCTTGGGAGCCAAGAACTC    |
|                      |                         | R | GCCTGCTCCTTAGGTATCAG    |
| <i>Erra</i>          | NM_007953               | F | GGAGGACGGCAGAAGTACAAA   |
|                      |                         | R | GCGACACCAGAGCGTTCAC     |
| <i>Pgcl1a</i>        | NM_008904               | F | AGCCGTGACCACTGACAACGAG  |
|                      |                         | R | GCTGCATGGTTCTGAGTGCTAAG |
| <i>Acat2</i>         | NM_001303253.1          | F | GGGCTGTCACACAATGGCTA    |
|                      |                         | R | GGTCAAGGGCGTTGAAAACC    |
| <i>Mcad</i>          | NM_007382               | F | TTGGCACGTTCTAACCAGAT    |
|                      |                         | R | TCGCTGGCCCATGTTTAGT     |
| <i>Atp5b</i>         | NM_016774               | F | AGGGTGGGAAAATCGGACTCT   |
|                      |                         | R | ACGGGTCCTCTCACCAACAC    |
| <i>Cyp4a12<br/>b</i> | NM_172306.2             | F | GAGTGTCTCTAATGGCTGCTTG  |
|                      |                         | R | TGGCCCTCGAACATGAAAGT    |
| <i>Aldh1b1</i>       | NM_028270.4             | F | GAGCTTAGCTGGTGACGGAA    |
|                      |                         | R | GTTCTCCGGTCAGTTCAGCA    |
| <i>Cpt1a</i>         | AF017175                | F | CCTCCCTGGGCATGATTG      |
|                      |                         | R | ACGCCACTCACGATGTTCTTC   |
| <i>Sdh</i>           | BC031849                | F | ATCCATCGAGCCTTACC       |
|                      |                         | R | CATAGAGTCCGTCCAGTTT     |
| <i>Gapdh</i>         | AY618199.1              | F | CTGCACCACCAACTGCTTAGC   |
|                      |                         | R | GGAAGGCCATGCCAGTGA      |
